# Supplementary material for: Sub‐cellular location of FtsH proteases in the cyanobacterium S ynechocystis sp. PCC 6803 suggests localised PSII repair zones in the thylakoid membranes
Source: PubMed Central journal article supplement (PMC4949578; doi:10.1111/mmi.12940), 2015-02-11
Supplement: MMI-96-448-s001.pdf [file MMI-96-448-s001.pdf]

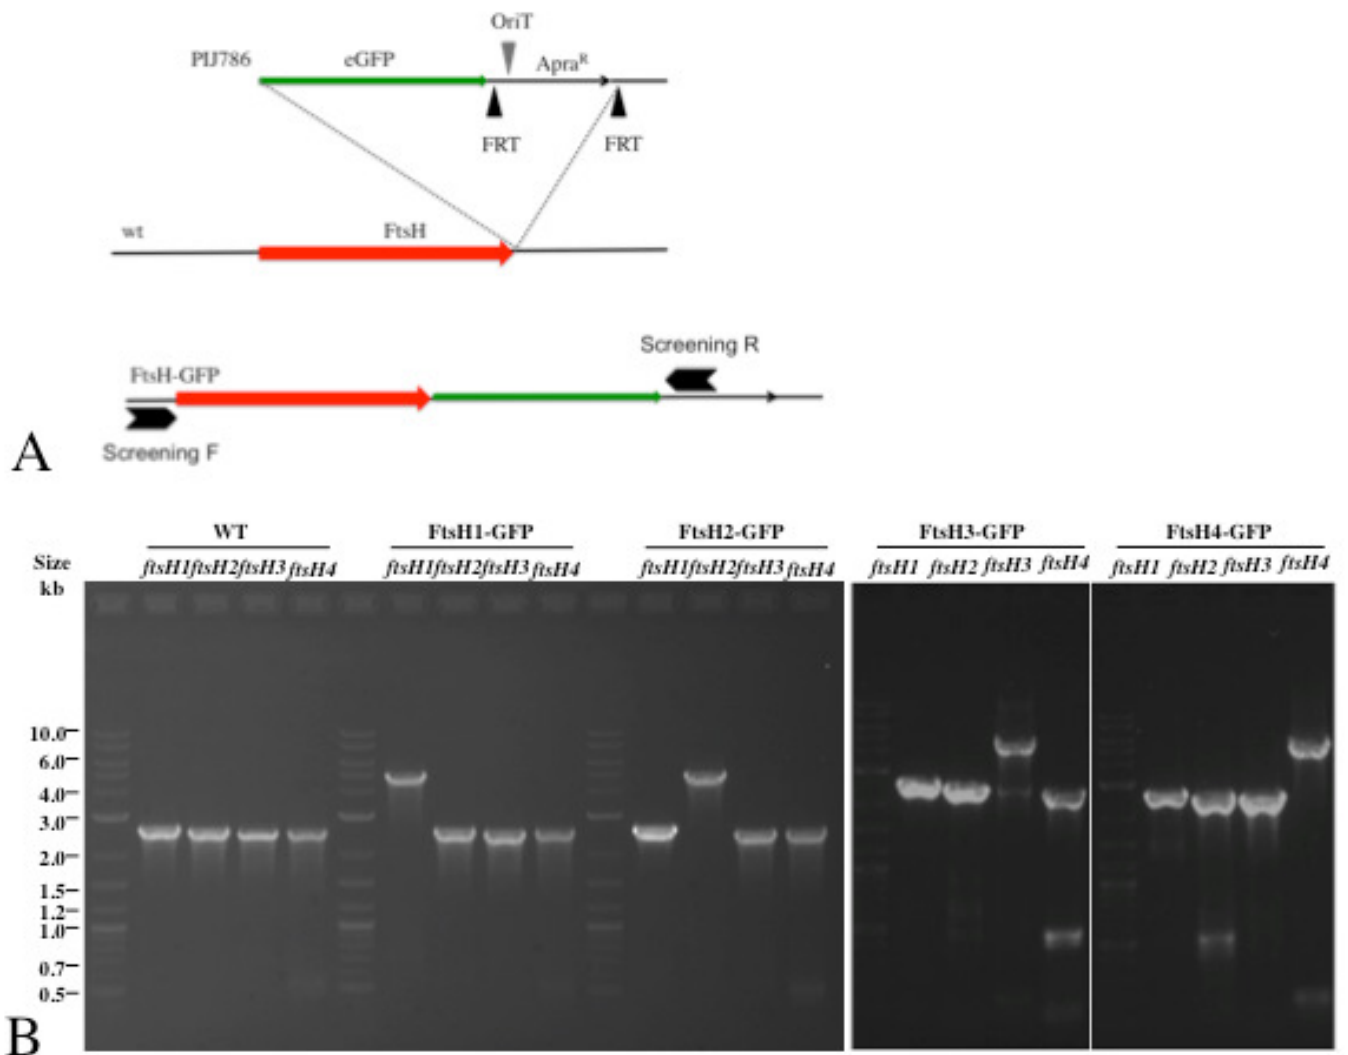

**Supporting Figure 1** (A) Construction of genes encoding GFP fusions to the C-terminal end of each FtsH protease by amplification of wild-type gene and *gfp*-*Apramycin*<sup>R</sup> cassette from plasmid PIJ786. (B) segregation test and screening for *gfp* fusion with PCR. Primers chosen to amplify the entire *ftsH* ORF and 650bp downstream sequence. Expected sizes of PCR products ~2.5kb for wild-type and ~4.5kb for *ftsH*+*gfp*+*Apra*<sup>R</sup>.

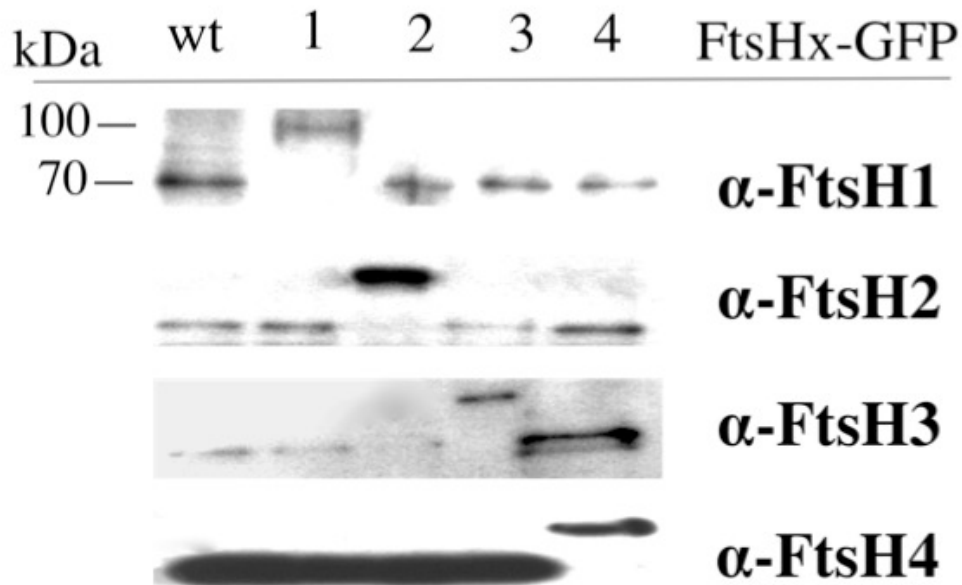

**Supporting Figure 2** Immunoblots with crude membrane fractions isolated from wild-type and each of the GFP-tagged strains (1 = *ftsH1-gfp*; 2 = *ftsH2-gfp*; 3 = *ftsH3-gfp*; 4 = *ftsH4-gfp*). Immunoblots performed with anti-FtsH antibodies specific for each FtsH protein. GFP-tagged FtsH proteins are ~100 kDa; native FtsH proteins ~70 kDa. Lanes loaded according to chlorophyll concentration (0.1 nmol chlorophyll per lane).

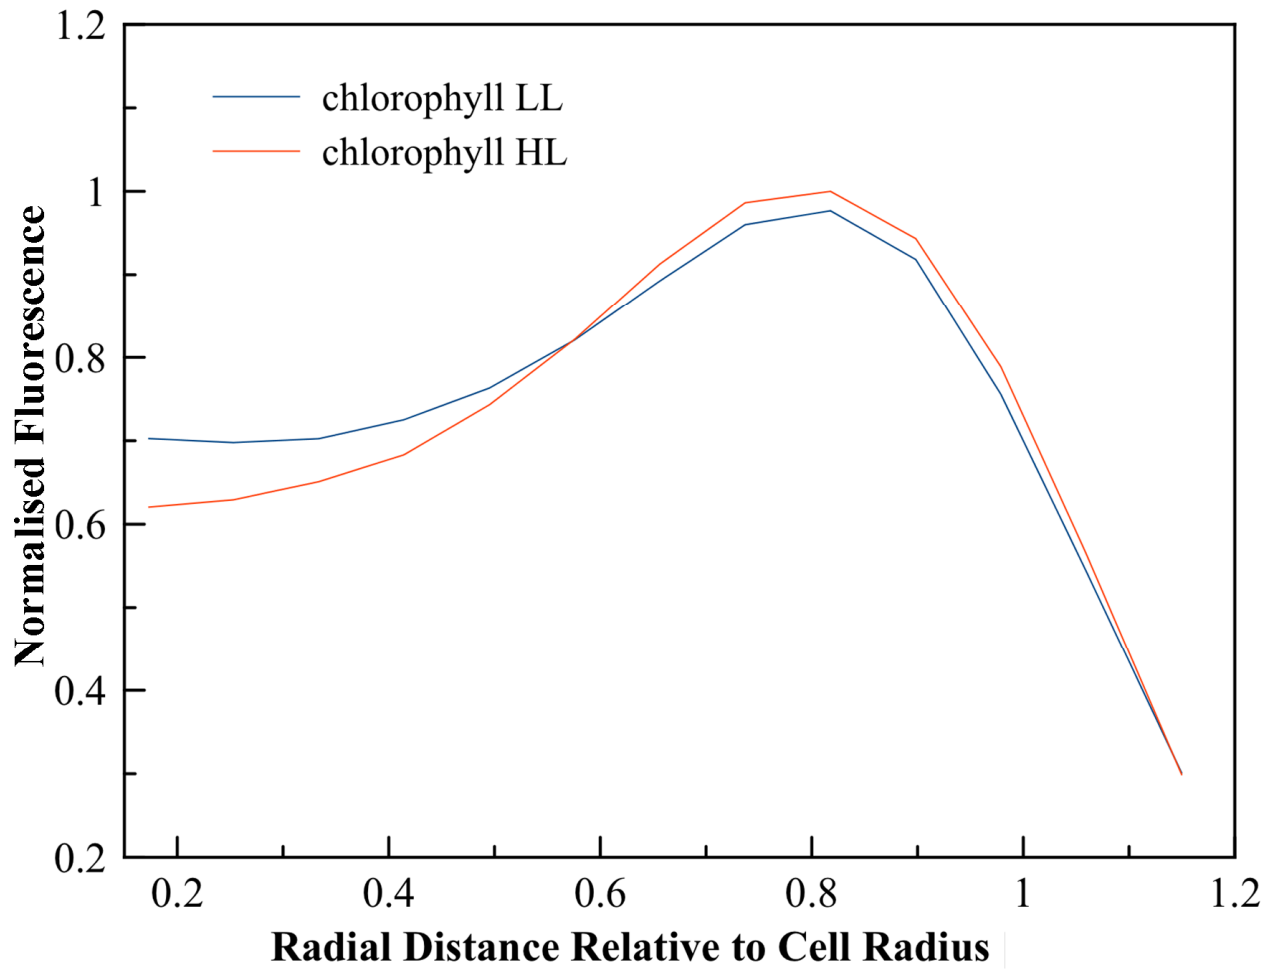

**Supporting Figure 3** High light exposure has little effect on the radial distribution of chlorophyll fluorescence in *Synechocystis* cells. Wild-type cells were grown in low light (LL) or exposed to high light (HL) at  $600 \mu\text{E m}^{-2} \text{s}^{-1}$  for 45-60 min. Averaged fluorescence radial distributions ( $n = 30$ , for 3 biological replicates), standardised to cell radius.

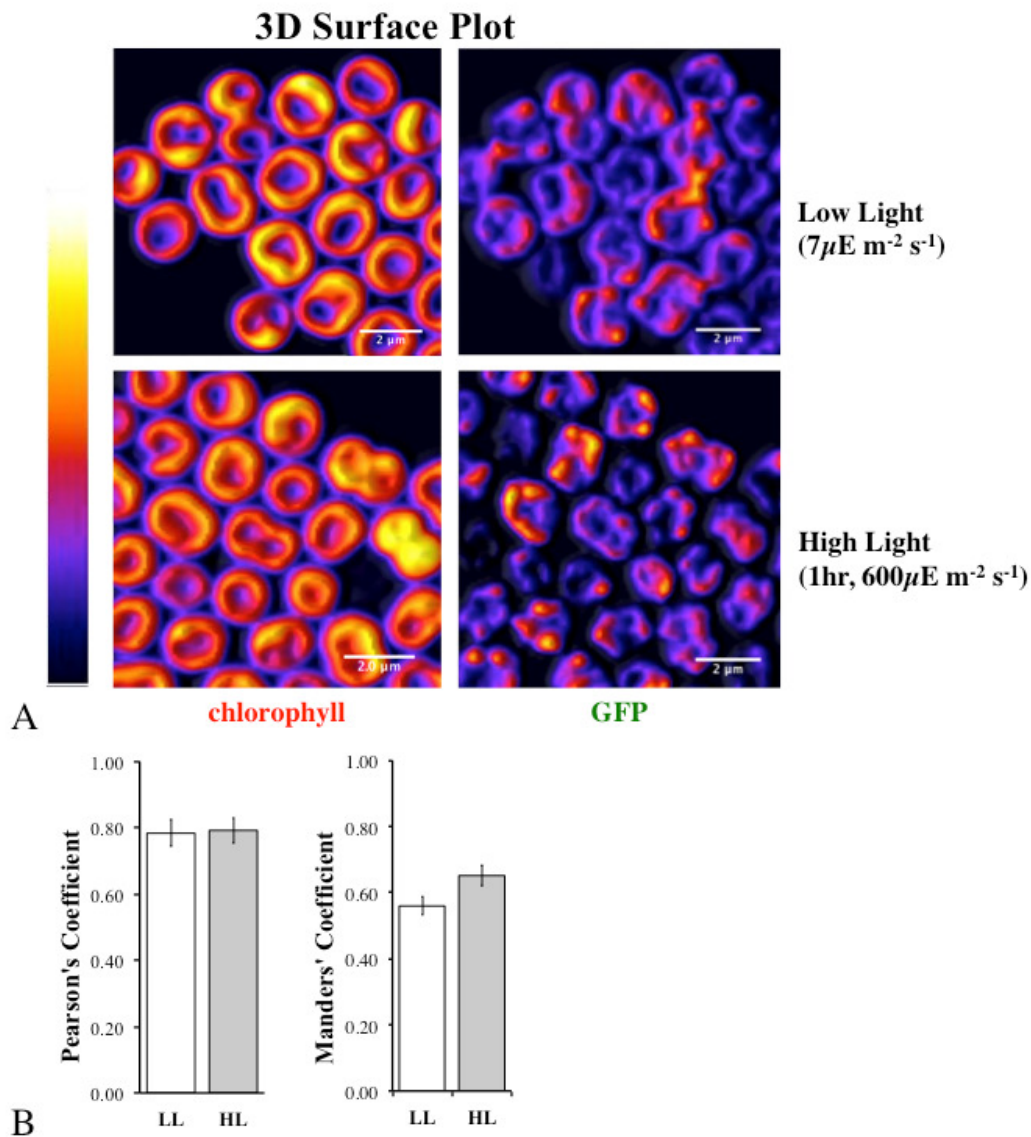

**Supporting Figure 4** Effect of high-light exposure on the relative distributions of chlorophyll and FtsH2-GFP in *Synechocystis* cells (A) False-colour 3D surface plots (with linear colour scale) of GFP and chlorophyll fluorescence in low-light and high light-exposed *Synechocystis* cells (B) Co-localisation of GFP and chlorophyll fluorescence assessed by Pearson's and Manders' coefficients. There are no significant differences between HL and LL ( $n = 30$ ,  $p = 0.30$  for Pearson's coefficient and 0.26 for Manders' coefficient, error bars show standard deviation, tested and averaged for 3 biological replicates).

**Supporting Table 1.** Mass spectrometric analysis of proteins from anti-GFP pull-downs from *Synechocystis fisch2-gfp* cells, showing recognised peptide sequences and ion scores, based on the calculated probability, P, Ion score cut off = 1. Sequences and ion scores are from low-light samples, except for proteins detected exclusively after high-light treatment (see Table 1). Data from 2 biological replicates for each condition.

| <b>ORF</b>     | <b>Protein ID</b> | <b>Sequence</b>                                       | <b>Ion score</b> |
|----------------|-------------------|-------------------------------------------------------|------------------|
|                |                   | <b>FVELGQVSAIR</b>                                    | <b>31</b>        |
|                |                   | <b>AYSQSIYLESQVR</b>                                  | <b>36</b>        |
| <i>slr0335</i> | <b>ApcE</b>       | <b>RFPTLPAANFPNTER</b>                                | <b>6</b>         |
|                |                   | <b>EIQQYNQILASQGLK</b>                                | <b>31</b>        |
|                |                   | <b>EYSDAFGEDTVPYER</b>                                | <b>31</b>        |
| <i>slr1311</i> | <b>CcmM</b>       | <b>Carbon dioxide concentrating mechanism protein</b> | <b>✓</b>         |
| <i>slr0012</i> | <b>RBL_SYN3</b>   | <b>FLFVQEAIEK</b>                                     | <b>51</b>        |
|                |                   | <b>WSPELAAACELWK</b>                                  | <b>17</b>        |
| <i>slr1834</i> | <b>psaA</b>       | <b>WGKPGHFDR</b>                                      | <b>56</b>        |
|                |                   | <b>LVPDKGQLGFR</b>                                    | <b>41</b>        |

|                |             |                                                 |           |
|----------------|-------------|-------------------------------------------------|-----------|
|                |             | <b>DYDPAKNVNNLLDR</b>                           | <b>53</b> |
| <i>slr1835</i> | <b>psaB</b> | <b>FSQDLAQDPTTR</b>                             | <b>28</b> |
|                |             | <b>DFGYSEPCDGPGR</b>                            | <b>27</b> |
|                |             | <b>VYLGAETTR</b>                                | <b>28</b> |
| <i>ssl0563</i> | <b>psaC</b> | <b>CETACPTDFLSIR</b>                            | <b>72</b> |
|                |             | <b>IYDTCIGCTQCVR</b>                            | <b>78</b> |
|                |             | <b>ACPLDVLEMVPWDGCK</b>                         | <b>16</b> |
|                |             | <b>IGQNPEPVTIK</b>                              | <b>51</b> |
| <i>slr0737</i> | <b>psaD</b> | <b>KEQCLALGTQLR</b>                             | <b>26</b> |
|                |             | <b>VYPSGEVQYLHPADGVF PEKVNEGR</b>               | <b>64</b> |
| <i>smr0004</i> | <b>psaI</b> | <b>Photosystem I reaction center subunit II</b> |           |
| <i>ssr2831</i> | <b>psaE</b> | <b>SGILYPVIVR</b>                               | <b>50</b> |
|                |             | <b>TFIGNLPAYR</b>                               | <b>70</b> |
| <i>slr1655</i> | <b>psaL</b> | <b>TFIGNPAYRK</b>                               | <b>23</b> |
|                |             | <b>AESNQVVQAYNGDPFVGHLSIPISDSAFTR</b>           | <b>5</b>  |

---

|                |             |                                       |     |
|----------------|-------------|---------------------------------------|-----|
|                |             |                                       | 57  |
|                |             | <b>NDIQPWQVR</b>                      |     |
|                |             | <b>GPNGLDLDKLR</b>                    | 52  |
|                |             | <b>LGANIASAQGPTGLGK</b>               | 94  |
| <i>sll0851</i> | <b>CP43</b> | <b>DLPSTGFAWWSGNAR</b>                | 87  |
|                |             | <b>GIDRETEPTLFMPDL</b>                | 32  |
|                |             | <b>VITNPTLNPAIIFGYLLK</b>             | 58  |
|                |             |                                       | 71  |
|                |             | <b>GYFQEEIQR</b>                      | 18  |
|                |             | <b>VHTVVLNDPGR</b>                    | 24  |
|                |             | <b>GYFQEEIQR</b>                      | 92  |
|                |             | <b>LAFYDYVGNSPAK</b>                  | 101 |
| <i>slr0906</i> | <b>CP47</b> | <b>YQWDKGYFQEEIQR</b>                 | 31  |
|                |             | <b>VDSQLAEGASLSEAWSTIPEK</b>          | 122 |
|                |             | <b>DVFAGVDPGLEEQVEFGVFAK</b>          | 102 |
|                |             | <b>AQLGEGFDFDTETFNSDGVFR</b>          | 78  |
|                |             | <b>RVDSQLAEGASLSEAWSTIPEK</b>         | 149 |
|                |             | <b>KAQLGEGFDFDTETFNSDGVFR</b>         |     |
|                |             | <b>FSVEQTGVTVSFYGGALDGQTFSNPSDVKK</b> | 22  |

---

|                        |               |                                   |           |
|------------------------|---------------|-----------------------------------|-----------|
| <i>ssl2598</i>         | <b>psbH</b>   | <b>LGDILRPLNSEYGK</b>             | <b>65</b> |
| <i>ssr3451</i>         | <b>psbE</b>   | <b>QELPILQER</b>                  | <b>57</b> |
| <i>sll0849</i>         | <b>psbD</b>   | <b>AYDFVSQELR</b>                 | <b>23</b> |
|                        |               | <b>AAEDPEFETFYTK</b>              | <b>67</b> |
| <i>slr1311/sll1867</i> | <b>psbA2/</b> | <b>VIGTWADVLNR</b>                | <b>62</b> |
|                        | <b>psbA3</b>  | <b>LIFQYASFNNSR</b>               | <b>61</b> |
| <i>slr1326</i>         | <b>atpA</b>   | <b>WDSLGRPIDGK</b>                | <b>22</b> |
|                        |               | <b>LLESPAPGHER</b>                | <b>51</b> |
| <i>slr1329</i>         | <b>atpB</b>   | <b>FVQAGSEVSALLGR</b>             | <b>61</b> |
|                        |               | <b>DV NKQDVLLFIDNIFR</b>          | <b>47</b> |
|                        |               | <b>MPSAVGYQPTLGTDVGDLQER</b>      | <b>20</b> |
|                        |               | <b>NSAGNEVAVTCEVQQLLGDNQVR</b>    | <b>34</b> |
| <i>slr1327</i>         | <b>atpC</b>   | <b>LSFAETELPLFEQRFVSLISSQPVVQ</b> | <b>48</b> |
|                        |               | <b>TLFPLSPQGLEAPDDEIFR</b>        | <b>13</b> |
| <i>slr0228</i>         | <b>FtsH2</b>  | <b>SRVDLPTNAPELIAR</b>            | <b>22</b> |
|                        |               | <b>LVDLLIEKETIDGEEFR</b>          | <b>41</b> |



TPGFSGADLANLLNEAAILTAR 7

---

|                |       |                        |    |
|----------------|-------|------------------------|----|
| <i>sll1463</i> | FtsH4 | AAEEIVFDSITTGAANDLQR   | 70 |
|                |       | TPGFAGADLANLVNEAALLEER | 25 |

---

|                |      |             |    |
|----------------|------|-------------|----|
| <i>sll0247</i> | isiA | RVEQAFDSLQT | 83 |
|----------------|------|-------------|----|

---

|                |      |               |     |
|----------------|------|---------------|-----|
| <i>sll1578</i> | cpcA | FLSSTELQIAFGR | 103 |
|----------------|------|---------------|-----|

---

|                |              |                |    |
|----------------|--------------|----------------|----|
| <i>slr1128</i> | hypothetical | DSAINSAQGDAQAR | 18 |
|----------------|--------------|----------------|----|

---
